# Supplementary material
Source: PubMed Central journal article supplement (PMC5494627)
Supplement: AEM.00797-17_zam999117938s1.pdf [file AEM.00797-17_zam999117938s1.pdf]

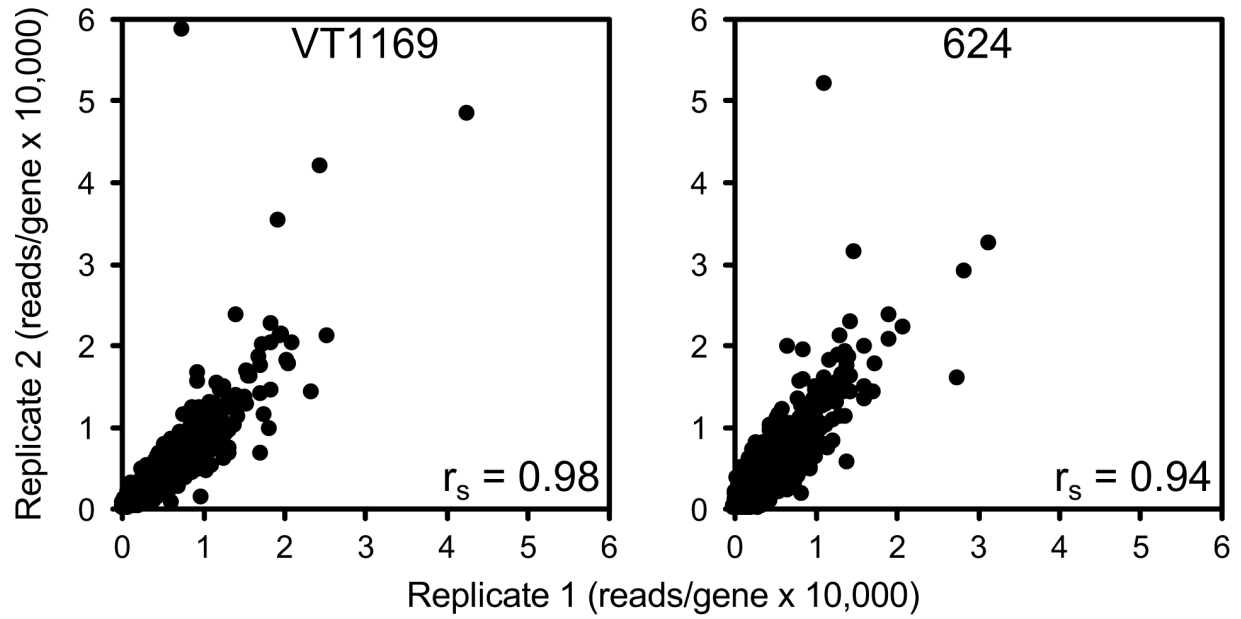

1  
 2 **Figure S1. Correlation between Tn-seq replicates for determining the *A.***  
 3 ***actinomycetemcomitans* essential genome.** Each point corresponds to a gene in  
 4 VT1169 (left) or 624 (right). The normalized reads/gene are plotted for replicates 1 and  
 5 2 on the X and Y axis, respectively.  $r_s$ , Spearman's rank correlation coefficient.

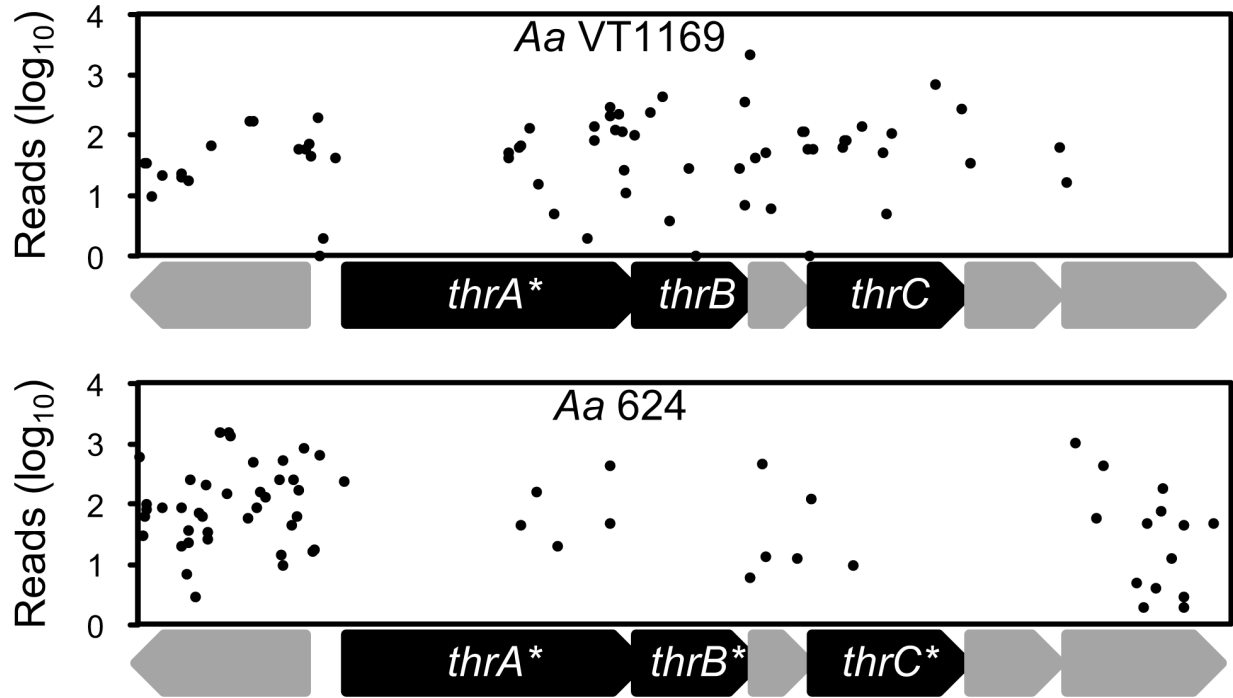

6

7 **Figure S2. Example of *A. actinomycetemcomitans* strain-specific gene**  
 8 **essentiality.** Each point corresponds to a transposon insertion in VT1169 (top) or 624  
 9 (bottom). X axis, genome position. Y axis, log<sub>10</sub> read count. Black, threonine  
 10 biosynthesis genes. \* indicates less than expected (DESeq2 adjusted  $p < 0.01$ ).

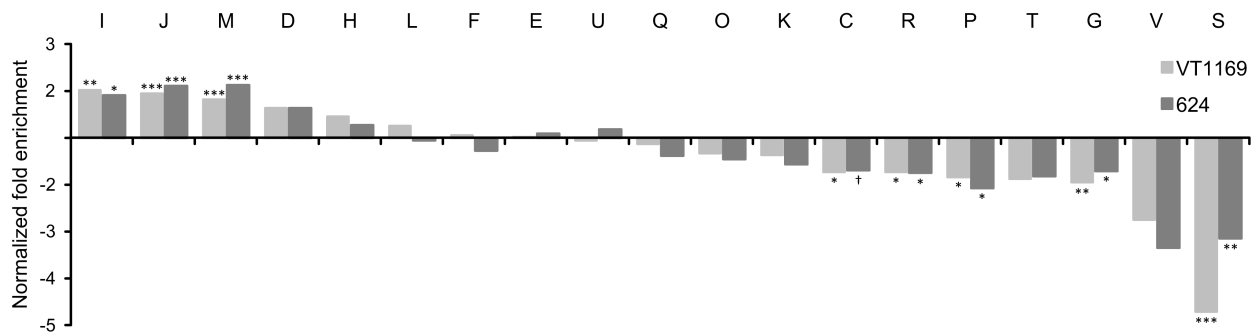

11

12 **Figure S3. Functional enrichment in the *A. actinomycetemcomitans* essential**

13 **genome.** Overlying data labels indicate clusters of orthologous groups (COGs).

14 Normalized fold enrichment (Y axis) is the percent of the essential genome made up by

15 a COG divided by the percent of the whole genome made up by the same COG. The Y

16 axis is adjusted such that 2-fold higher than the genome is +2, and 2-fold lower than the

17 genome is -2. \*,  $p < 0.05$ ; \*\*,  $p < 0.01$ ; \*\*\*,  $p < 0.001$  (two-tailed Fisher's exact test). I,

18 Lipid transport and metabolism. J, Translation, ribosomal structure, and biogenesis. M,

19 Cell wall/membrane/envelope biogenesis. D, Cell cycle control, cell division, and

20 chromosome partitioning. H, Coenzyme transport and metabolism. L, Replication,

21 recombination, and repair. F, Nucleotide transport and metabolism. E, Amino acid

22 transport and metabolism. U, Intracellular trafficking, secretion, and vesicular transport.

23 Q, Secondary metabolite biosynthesis, transport, and catabolism. O Post-translational

24 modification, protein turnover, and chaperones. K, Transcription. C, Energy production

25 and conversion. R, General function prediction only. P, Inorganic ion transport and

26 metabolism. S, Signal transduction mechanisms. G, Carbohydrate transport and

27 metabolism. V, Defense mechanisms. S, Function unknown.

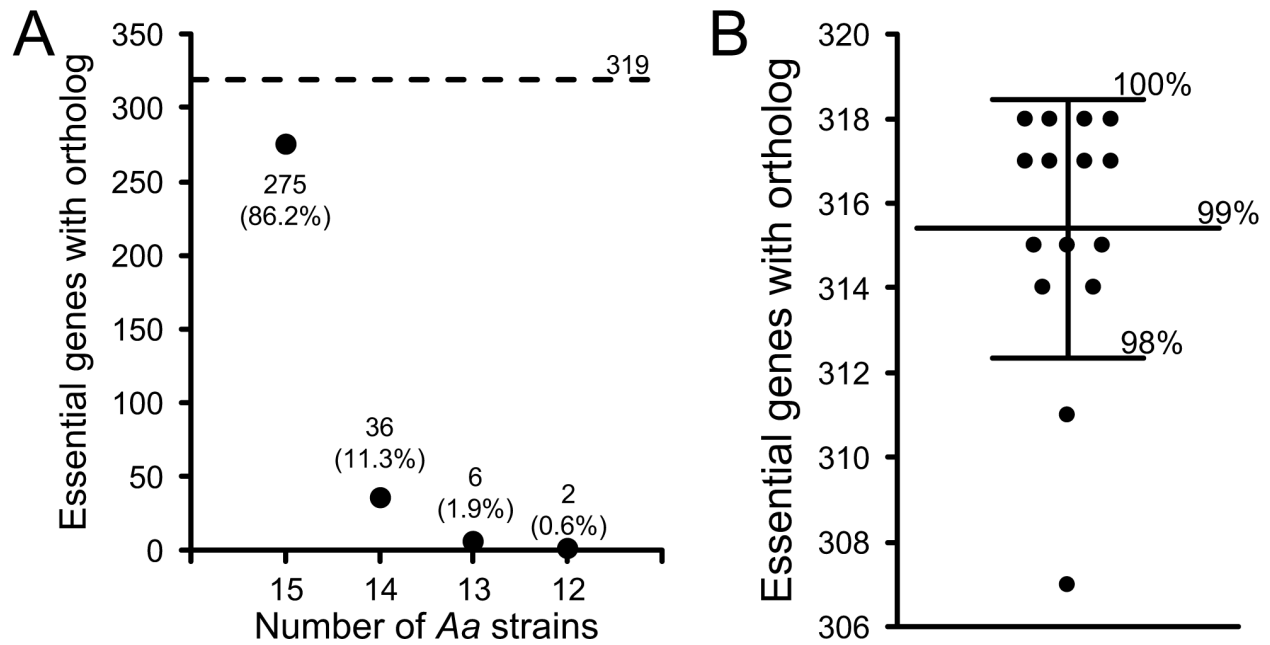

28

29 **Figure S4. Conservation of the *A. actinomycetemcomitans* essential genome**

30 **among strains.** (A) Y axis, number of core essential genes in VT1169 with an ortholog

31 in the indicated number of other *A. actinomycetemcomitans* strains (X axis). Dotted line,

32 total core essential genes in VT1169. Data labels, number of orthologs (percentages

33 are relative to 319). (B) Y axis, number of core essential genes in VT1169 with an

34 ortholog in another individual strain. Each point represents an individual strain of *A.*

35 *actinomycetemcomitans*. The percentages (relative to 319) indicate the average  $\pm$

36 standard deviation. (A) and (B) were essentially the same for 624 (see Dataset S1).

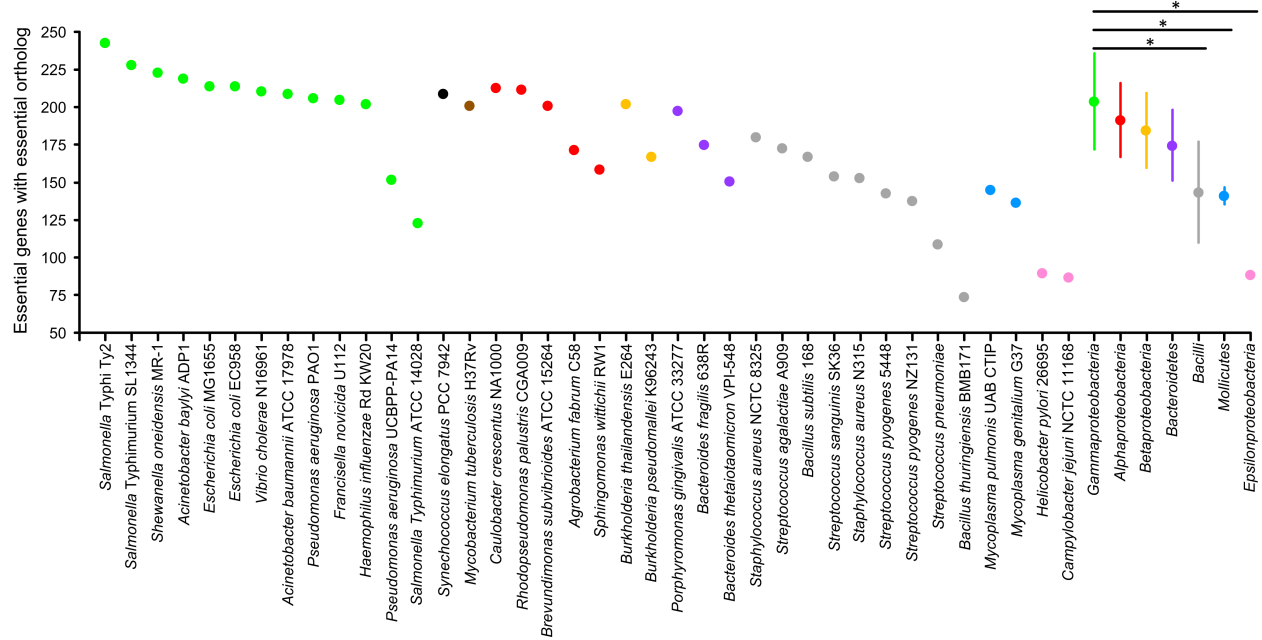

37

38 **Figure S5. Conservation of the core *A. actinomycetemcomitans* essential genome**

39 **among other species.** Y axis, number of core essential genes in VT1169 with an

40 ortholog in the essential genome of the indicated species (X axis). The corresponding

41 numbers in 624 varied at most from VT1169 by 1 (see Dataset S1). Each species is

42 colored according to its phylogenetic class. The average for each class is shown on the

43 right. The *Cyanobacteria* and *Actinobacteria* are not shown since they are represented

44 by single species (*S. elongatus* and *M. tuberculosis*, respectively). Error bars represent

45 standard deviation (n = 2-13). \*, p < 0.001 (two-tailed Student's *t* test).

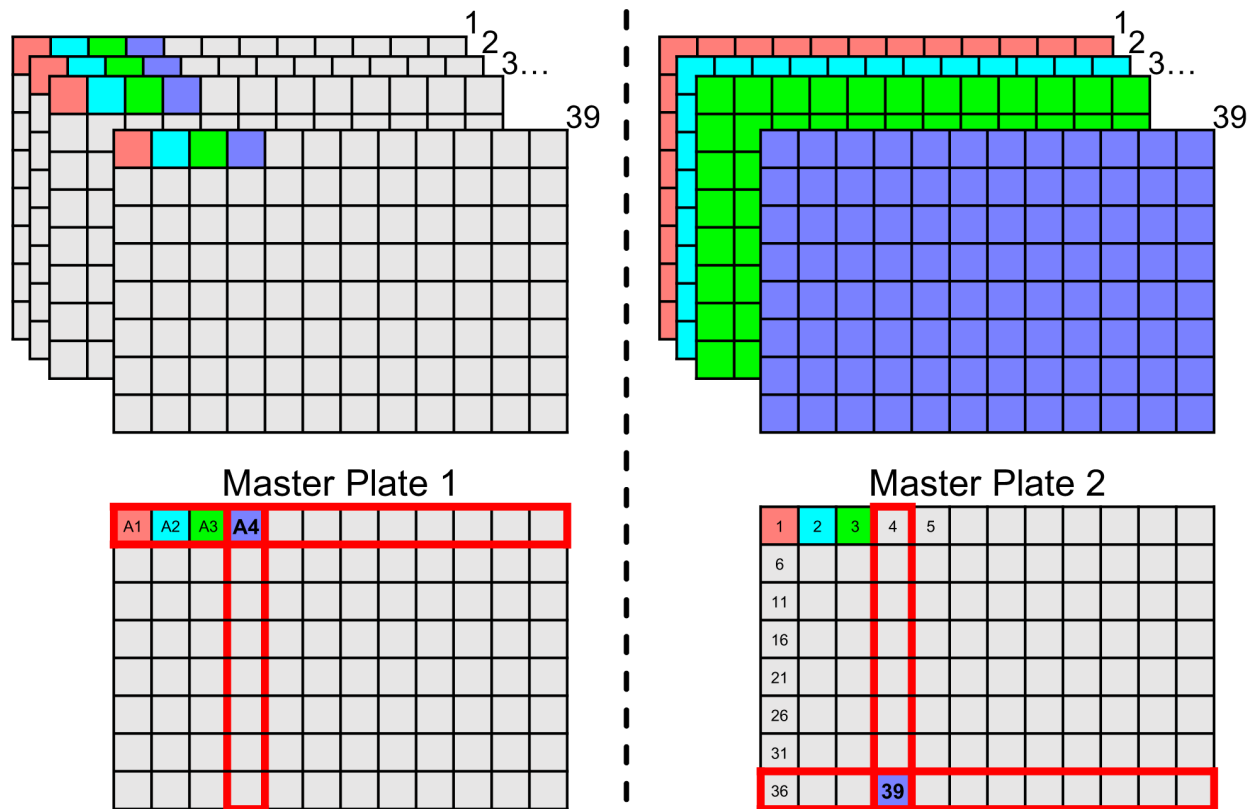

47 **Figure S6. The Cartesian Pooling-Coordinate Sequencing method.** In the CP-CSeq  
 48 method, 2 master plates (MP) are made. Each well of each plate goes into the  
 49 corresponding well in MP1 (left), whereas all of the wells per plate each go into a  
 50 separate well in MP2 (right). Then, Tn-seq is done on each row and column of each MP.  
 51 The *A. actinomycetemcomitans* ordered library comprises 39 plates, so it required 33  
 52 Tn-seq reactions (8 MP1 rows + 12 MP1 columns + 8 MP2 rows + 5 MP2 columns). In  
 53 the example shown, the mutant in well A4 of plate 39 can be identified by finding the  
 54 intersection between row A and column 4 in MP1 and row H and column 4 in MP2.

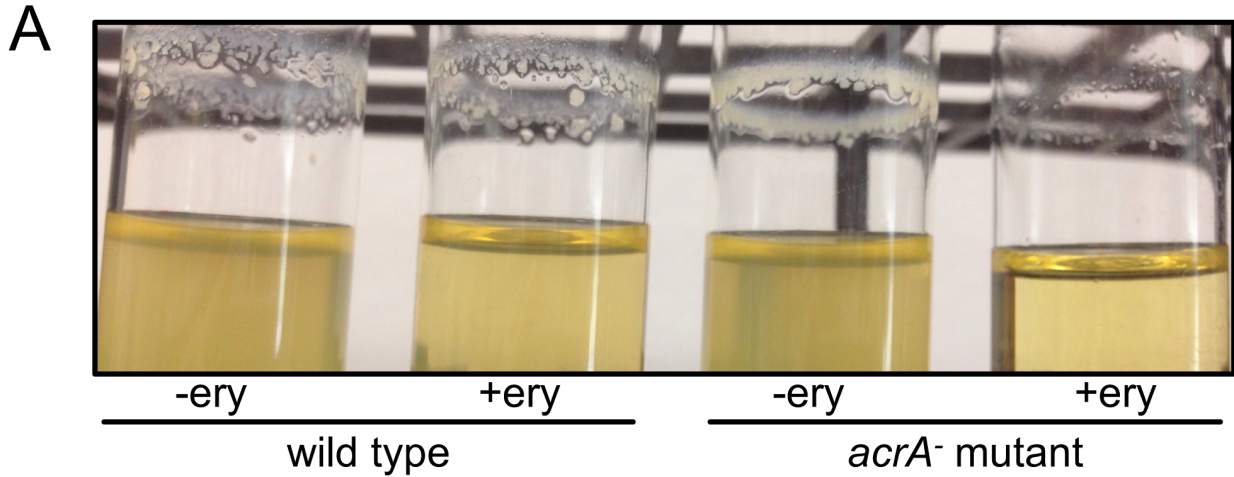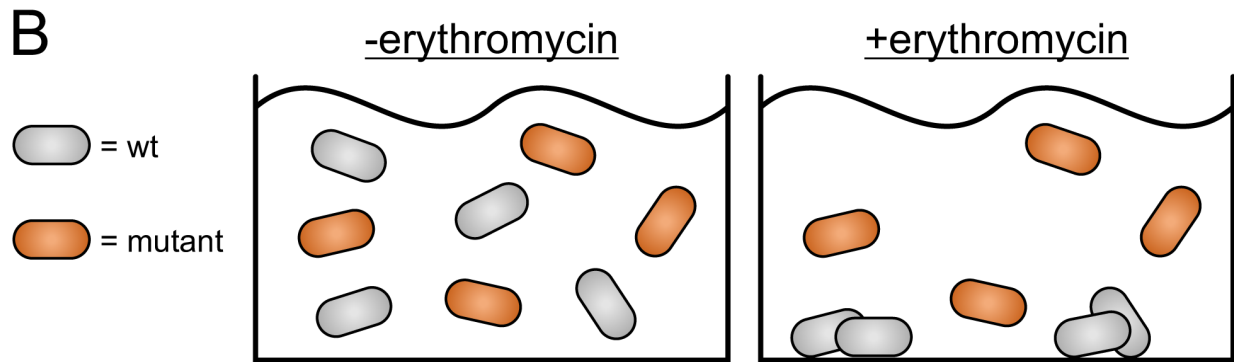

55

56 **Figure S7. Factors that mediate *A. actinomycetemcomitans* erythromycin**  
 57 **resistance.** (A) The wild type and hyper-sensitive *acrA*<sup>-</sup> mutant were grown with half-  
 58 MIC erythromycin (1 µg/ml, +ery) or the solvent control (same volume of pure ethanol, -  
 59 ery). (B) Screen for mutants that do not attach in response to erythromycin. Attachment-  
 60 defective mutants become enriched in the liquid phase specifically in the presence of  
 61 antibiotic (right). wt, wild type.

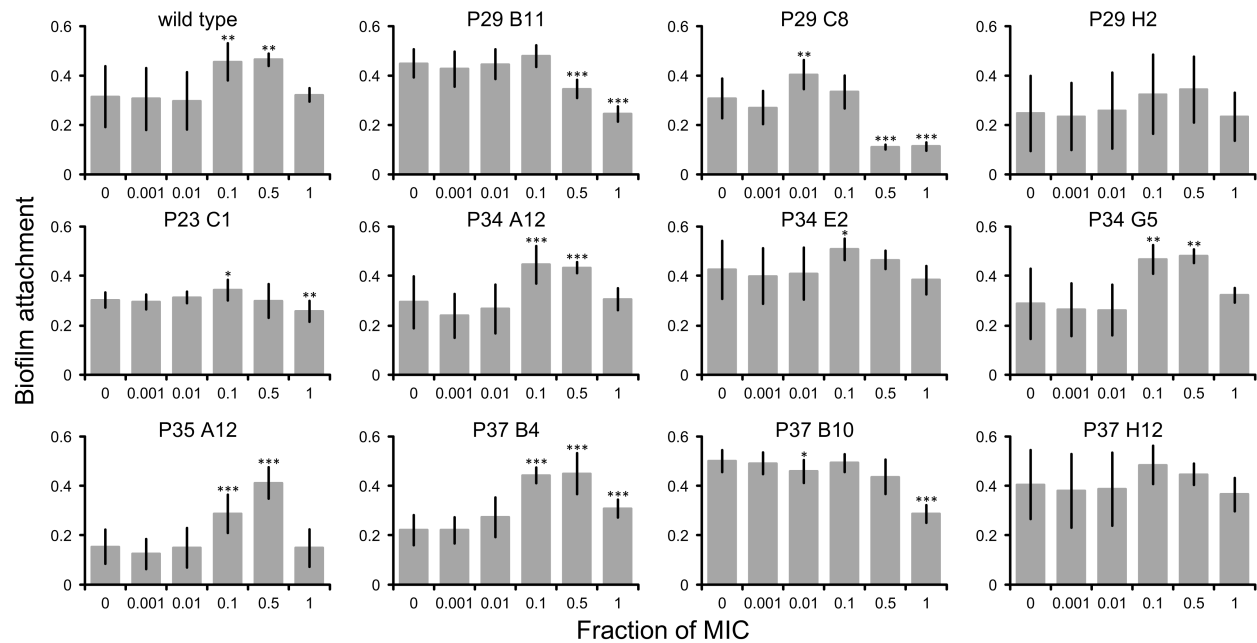

62

63 **Figure S8. Factors that mediate *A. actinomycetemcomitans* erythromycin-induced**

64 **attachment.** Biofilm attachment was measured using crystal violet. X axis, fraction of

65 minimum inhibitory concentration (MIC) for erythromycin. Y axis, absorbance ( $A_{620}$ )

66 reading for crystal violet bound to biofilms. Overlying data labels indicate the plate and

67 well in the ordered library that was the source of the mutant (see Figure 3 for gene

68 products). Error bars represent standard deviation (n = 11-16). Significance was

69 determined for each concentration compared to no erythromycin addition. \*, p < 0.05; \*\*, p < 0.01; \*\*\*, p < 0.001 (two-tailed Student's *t* test).

70



71 **Table S1. Summary of Tn-seq analysis for essential genome.**

| Sample        | Rep | Total reads | With IR <sup>a</sup> | Processed <sup>b</sup> | Mapped <sup>c</sup> | Sites <sup>d</sup> | No slip <sup>e</sup> | In both <sup>f</sup> |
|---------------|-----|-------------|----------------------|------------------------|---------------------|--------------------|----------------------|----------------------|
| VT1169        | 1   | 13,574,870  | 11,531,485<br>(85%)  | 10,480,596<br>(91%)    | 9,084,230<br>(87%)  | 44,329             | 43,564               | 32,344               |
|               | 2   | 9,893,314   | 8,881,261<br>(90%)   | 8,649,894<br>(97%)     | 7,711,040<br>(89%)  | 38,553             | 37,748               |                      |
| 624           | 1   | 15,346,282  | 11,862,440<br>(77%)  | 10,189,279<br>(86%)    | 3,921,979<br>(38%)  | 39,000             | 38,643               | 26,530               |
|               | 2   | 22,724,657  | 18,817,125<br>(83%)  | 16,916,684<br>(90%)    | 12,801,472<br>(76%) | 37,325             | 36,273               |                      |
| no antibiotic | -   | 7,637,188   | 6,919,034<br>(91%)   | 6,452,821<br>(93%)     | 5,942,808<br>(92%)  | 2,634              | 2,013                | -                    |
| erythromycin  | -   | 8,035,917   | 6,743,078<br>(84%)   | 5,740,553<br>(85%)     | 5,202,209<br>(91%)  | 2,516              | 1,949                | -                    |

72 Percentages are relative to the value in the adjacent left column.

73 <sup>a</sup>Reads containing the transposon inverted repeat (IR) sequence (CCAACCTGTTA) with  
74 0 mismatches in its expected location (IR end position at base 38-40) within the read

75 <sup>b</sup>Reads remaining after trimming 3' low-quality bases (phred score + 33 < 20), trimming  
76 poly-C tails, and removing reads <20 bases long

77 <sup>c</sup>Reads mapping end-to-end to the *A. actinomycetemcomitans* genome with high quality  
78 (MAPQ > 39)

79 <sup>d</sup>Sites identified after accounting for the 2 bp duplication associated with mariner  
80 insertion events (by adding 2 to the genome position of reads mapping to the negative  
81 strand)

82 <sup>e</sup>Sites remaining after correcting for polymerase slippage by collapsing adjacent sites  
83 onto the site with the highest read count (local maximum)

84 <sup>f</sup>Sites present in both replicates (1 aliquot of the mutant pool before amplification, 1 after  
85 amplification)

86 **Table S2. Smoothing to correct for distance from origin.**

| Sample        | Replicate | Max:min* |
|---------------|-----------|----------|
| VT1169        | 1         | 1.24     |
|               | 2         | 1.97     |
| 624           | 1         | 1.15     |
|               | 2         | 1.27     |
| no antibiotic | -         | 1.20     |
| erythromycin  | -         | 1.17     |

87 \*Fold difference between the maximum and minimum values of the LOESS regression  
 88 for insertion abundance vs. location, indicating how much insertions close to the origin  
 89 were inflated relative to those close to the terminus prior to smoothing

90 **Table S3. Gene essentiality in *A. actinomycetemcomitans* VT1169 and 624.**

| Strain | Total genes | Essential genes <sup>a</sup> | Essential orthologs in both strains <sup>b</sup> | Essential orthologs in 1 strain only <sup>b</sup> | Essential accessory genes <sup>b</sup> |
|--------|-------------|------------------------------|--------------------------------------------------|---------------------------------------------------|----------------------------------------|
| VT1169 | 1,912       | 413<br>(22%)                 | 319<br>(77%)                                     | 86<br>(21%)                                       | 8<br>(2%)                              |
| 624    | 2,164       | 386<br>(18%)                 | 319<br>(83%)                                     | 54<br>(14%)                                       | 13<br>(3%)                             |

91 <sup>a</sup>Percentages are relative to the value in the 'Total genes' column.

92 <sup>b</sup>Percentages are relative to the value in the 'Essential genes' column.

93 **Table S4. Metabolic pathways that are essential in *A. actinomycetemcomitans*.**

|                                 |                                                  |
|---------------------------------|--------------------------------------------------|
| Carbohydrate metabolism         | Glycolysis                                       |
|                                 | Pyruvate dehydrogenase                           |
|                                 | Pentose phosphate pathway                        |
|                                 | Phosphoribosyl pyrophosphate (PRPP) biosynthesis |
|                                 | Fructose catabolism                              |
|                                 | Acetate fermentation                             |
| Energy metabolism               | ATP synthase                                     |
|                                 | Cytochrome oxidase                               |
| Lipid metabolism                | Fatty acid biosynthesis                          |
|                                 | Phospholipid biosynthesis                        |
| Nucleotide metabolism           | Purine metabolism                                |
|                                 | Pyrimidine metabolism                            |
| Amino acid metabolism           | Glutamine/glutamate biosynthesis                 |
|                                 | Glycine/serine biosynthesis                      |
|                                 | Threonine biosynthesis <sup>a</sup>              |
|                                 | Cysteine biosynthesis <sup>a</sup>               |
|                                 | S-adenosyl methionine (SAM) metabolism           |
|                                 | Lysine/diaminopimelate biosynthesis              |
|                                 | Chorismate biosynthesis                          |
|                                 | Glutathione biosynthesis <sup>a</sup>            |
| Glycan metabolism               | Lipopolysaccharide biosynthesis                  |
|                                 | Peptidoglycan biosynthesis                       |
| Cofactor and vitamin metabolism | Riboflavin metabolism                            |
|                                 | Coenzyme A (CoA) biosynthesis                    |
|                                 | Lipoic acid biosynthesis <sup>b</sup>            |
|                                 | Tetrahydrofolate (THF) metabolism                |
|                                 | Heme biosynthesis                                |
|                                 | Menaquinone biosynthesis                         |
| Terpenoid backbone metabolism   | Isoprenoid biosynthesis                          |
| Genetic information processing  | RNA polymerase                                   |
|                                 | Ribosome                                         |
|                                 | Aminoacyl-tRNA biosynthesis                      |
|                                 | RNA degradation                                  |
|                                 | DNA replication                                  |
|                                 | DNA repair                                       |
| Membrane transport              | Sec-dependent protein export                     |
|                                 | Thiamine transport                               |
|                                 | Spermidine transport                             |
|                                 | Arginine transport                               |
|                                 | Cystine transport                                |
|                                 | Peptide transport                                |
| Zinc transport <sup>a</sup>     |                                                  |

|  |                              |
|--|------------------------------|
|  | Lipopolysaccharide transport |
|  | Lipoprotein transport        |

94 <sup>a</sup>Essential in *A. actinomycetemcomitans* 624 only

95 <sup>b</sup>Essential in *A. actinomycetemcomitans* VT1169 only

96 **Table S5. Potential *A. actinomycetemcomitans*-specific genes that lack an**  
 97 **ortholog in DEG.**

| VT1169      | 624      | Product                              |
|-------------|----------|--------------------------------------|
| VT1169_1070 | 624_2202 | polysaccharide biosynthesis protein  |
| VT1169_0067 | 624_1100 | sodium:glutamate symporter GltS      |
| VT1169_0520 | 624_2137 | thiamine transporter component ThiB  |
| VT1169_0129 | 624_0989 | sigmaE negative regulator RseC       |
| VT1169_0156 | 624_1789 | prepilin peptidase CpaA              |
| VT1169_1349 | NA*      | fatty acid metabolism regulator FadR |

98 \*Did not lack an ortholog in DEG.

99 **Table S6. Summary of Tn-seq analysis for ordered library.**

| MP | Row | Col | Total reads | With IR <sup>a</sup> | Processed <sup>b</sup> | Mapped <sup>c</sup> | Tags <sup>e</sup> | Top tags <sup>f</sup> | Sites <sup>d</sup> |
|----|-----|-----|-------------|----------------------|------------------------|---------------------|-------------------|-----------------------|--------------------|
| 1  | A   |     | 6,148,148   | 4,830,936<br>(79%)   | 3,649,129<br>(76%)     | NA                  | 45,957            | 468                   | NA                 |
| 1  | B   |     | 5,373,820   | 4,531,279<br>(84%)   | 3,491,154<br>(77%)     | NA                  | 39,567            | 468                   | NA                 |
| 1  | C   |     | 3,887,289   | 3,251,179<br>(84%)   | 2,536,589<br>(78%)     | NA                  | 33,022            | 468                   | NA                 |
| 1  | D   |     | 6,358,670   | 5,090,909<br>(80%)   | 3,999,603<br>(79%)     | NA                  | 40,989            | 468                   | NA                 |
| 1  | E   |     | 5,608,446   | 4,667,131<br>(83%)   | 3,595,898<br>(77%)     | NA                  | 46,329            | 468                   | NA                 |
| 1  | F   |     | 4,969,310   | 4,203,787<br>(85%)   | 3,219,153<br>(77%)     | NA                  | 39,214            | 468                   | NA                 |
| 1  | G   |     | 4,566,115   | 3,829,211<br>(84%)   | 3,034,204<br>(79%)     | NA                  | 38,681            | 468                   | NA                 |
| 1  | H   |     | 2,492,905   | 1,964,043<br>(79%)   | 1,510,392<br>(77%)     | NA                  | 29,692            | 468                   | NA                 |
| 1  |     | 1   | 3,545,682   | 2,447,125<br>(69%)   | 1,888,617<br>(77%)     | NA                  | 25,242            | 312                   | NA                 |
| 1  |     | 2   | 4,499,009   | 3,839,363<br>(85%)   | 3,105,883<br>(81%)     | NA                  | 32,024            | 312                   | NA                 |
| 1  |     | 3   | 4,021,073   | 3,348,562<br>(83%)   | 2,676,740<br>(80%)     | NA                  | 28,033            | 312                   | NA                 |
| 1  |     | 4   | 1,234,204   | 869,763<br>(70%)     | 680,343<br>(78%)       | NA                  | 13,083            | 312                   | NA                 |
| 1  |     | 5   | 3,401,107   | 2,354,929<br>(69%)   | 1,900,598<br>(81%)     | NA                  | 20,561            | 312                   | NA                 |
| 1  |     | 6   | 1,644,076   | 1,133,790<br>(69%)   | 880,485<br>(78%)       | NA                  | 12,469            | 312                   | NA                 |
| 1  |     | 7   | 3,119,598   | 2,490,508<br>(80%)   | 1,924,580<br>(77%)     | NA                  | 20,123            | 312                   | NA                 |
| 1  |     | 8   | 4,321,024   | 3,649,591<br>(84%)   | 2,785,342<br>(76%)     | NA                  | 21,526            | 312                   | NA                 |
| 2  |     | 9   | 2,764,821   | 2,206,111<br>(80%)   | 1,741,078<br>(79%)     | NA                  | 18,909            | 312                   | NA                 |
| 1  |     | 10  | 1,808,258   | 1,358,814<br>(75%)   | 1,033,058<br>(76%)     | NA                  | 16,152            | 312                   | NA                 |
| 1  |     | 11  | 5,647,526   | 4,519,559<br>(80%)   | 3,362,231<br>(74%)     | NA                  | 38,515            | 312                   | NA                 |
| 1  |     | 12  | 7,128,590   | 5,956,554<br>(84%)   | 4,627,746<br>(78%)     | NA                  | 42,519            | 312                   | NA                 |
| 2  | A   |     | 3,164,558   | 2,542,368<br>(80%)   | 2,006,113<br>(79%)     | NA                  | 26,697            | 480                   | NA                 |
| 2  | B   |     | 2,437,736   | 1,860,128<br>(76%)   | 1,481,401<br>(80%)     | NA                  | 19,600            | 480                   | NA                 |
| 2  | C   |     | 1,861,927   | 1,363,173<br>(73%)   | 1,061,002<br>(78%)     | NA                  | 18,919            | 480                   | NA                 |

|                            |   |   |           |                    |                    |                    |        |     |       |
|----------------------------|---|---|-----------|--------------------|--------------------|--------------------|--------|-----|-------|
| 2                          | D |   | 2,472,193 | 1,911,489<br>(77%) | 1,528,554<br>(80%) | NA                 | 22,258 | 480 | NA    |
| 2                          | E |   | 5,805,898 | 4,543,344<br>(78%) | 3,336,726<br>(73%) | NA                 | 26,941 | 480 | NA    |
| 2                          | F |   | 3,145,652 | 2,518,957<br>(80%) | 2,003,930<br>(80%) | NA                 | 28,317 | 480 | NA    |
| 2                          | G |   | 1,908,165 | 1,319,514<br>(69%) | 979,268<br>(74%)   | NA                 | 16,016 | 480 | NA    |
| 2                          | H |   | 1,774,856 | 1,293,266<br>(73%) | 1,015,537<br>(79%) | NA                 | 14,854 | 384 | NA    |
| 2                          |   | 1 | 2,942,490 | 2,427,646<br>(83%) | 1,967,551<br>(81%) | NA                 | 29,300 | 768 | NA    |
| 2                          |   | 2 | 3,592,573 | 2,995,991<br>(83%) | 2,452,254<br>(82%) | NA                 | 29,569 | 768 | NA    |
| 2                          |   | 3 | 2,726,438 | 2,185,599<br>(80%) | 1,781,679<br>(82%) | NA                 | 27,188 | 768 | NA    |
| 2                          |   | 4 | 3,685,855 | 3,043,665<br>(83%) | 2,498,167<br>(82%) | NA                 | 33,499 | 768 | NA    |
| 2                          |   | 5 | 3,241,506 | 2,603,686<br>(80%) | 2,120,114<br>(81%) | NA                 | 26,313 | 672 | NA    |
| no antibiotic <sup>g</sup> |   |   | 7,637,188 | 6,919,034<br>(91%) | 6,452,821<br>(93%) | 5,942,808<br>(92%) | 44,658 | NA  | 2,634 |

100 Percentages are relative to the value in the adjacent left column.

101 <sup>a</sup>Reads containing the transposon inverted repeat (IR) sequence (CCAACCTGTTA) with  
102 0 mismatches in its expected location within the read (IR end position at base 39)

103 <sup>b</sup>Reads remaining after trimming 3' low-quality bases (phred + 33 < 35), trimming poly-C  
104 tails, and removing reads <12 bases long

105 <sup>c</sup>Reads mapping end-to-end to the *A. actinomycetemcomitans* genome with high quality  
106 (MAPQ > 39)

107 <sup>d</sup>Sites identified after accounting for the 2 bp duplication associated with mariner  
108 insertion events (by adding 2 to the genome position of reads mapping to the negative  
109 strand)

110 <sup>e</sup>Unique 12-bp sequences next to transposon insertions

111 <sup>f</sup>Most abundant tags corresponding to the number expected if only 1 mutant was  
112 present per well



113 <sup>g</sup>Control for erythromycin screen (see Table S1)

114 **Table S7. Ordered transposon mutant library.**

|                                        |               |
|----------------------------------------|---------------|
| Insertion mutants arrayed into wells   | 3,744 mutants |
| Wells successfully mapped*             | 3,245 wells   |
| Mutants per well                       |               |
| 1 mutant per well                      | 981 wells     |
| 2 mutants per well                     | 990 wells     |
| 3 mutants per well                     | 665 wells     |
| 4 mutants per well                     | 352 wells     |
| >4 mutants per well                    | 257           |
| Wells occupied per mutant              |               |
| Found in only 1 well                   | 1,120 mutants |
| Found in 2 wells                       | 57 mutants    |
| Found in 3 wells                       | 9 mutants     |
| Found in 4 wells                       | 80 mutants    |
| Found in >4 wells                      | 265 mutants   |
| Unique insertions                      | 1,531         |
| Within coding genes (excluding 3' 10%) | 990           |
| Intergenic                             | 541           |
| Coding genes hit internally (of 1,912) | 626           |
| Coding genes not hit internally        | 1,286         |

115 \*Found to contain a mutant(s) using CP-CSeq

116 **Table S8. Summary of Tn-seq results for erythromycin screen.**

| Fold change vs. control | Analysis level     | Total sites or genes | Inter-genic sites | Genic sites | Genes hit internally <sup>a</sup> | Combined <sup>b</sup> |
|-------------------------|--------------------|----------------------|-------------------|-------------|-----------------------------------|-----------------------|
| Negative                | Sites              | 14                   | 6                 | 8           | 7                                 | 9                     |
|                         | Genes <sup>a</sup> | 7                    | -                 | -           | -                                 |                       |
| Positive                | Sites              | 147                  | 49                | 98          | 90                                | 90                    |
|                         | Genes <sup>a</sup> | 15                   | -                 | -           | -                                 |                       |

117 <sup>a</sup>Not within the 3' 10% of the gene

118 <sup>b</sup>Total genes that changed in the combined results

119 **Table S9. COG enrichment analysis for genes that increased in abundance in the**  
120 **presence of erythromycin.**

| COG category | Function                | Fold enrichment <sup>a</sup> | P value <sup>b</sup> |
|--------------|-------------------------|------------------------------|----------------------|
| P            | Inorganic ion transport | 1.9                          | 0.07                 |
| V            | Defense mechanisms      | 6.4                          | 0.001                |

121 <sup>a</sup>Percent of the essential genome made up by a COG divided by the percent of the  
122 whole genome made up by same COG

123 <sup>b</sup>Two-tailed Fisher's exact test

124 **Script S1. vlookup.awk shell script mimicking vlookup function in Excel.**

125 Usage: vlookup.awk file1 file 2, where file1 is the binary relationship file and file2 is the

126 test file

127 Source: <http://unix.stackexchange.com/questions/88550/vlookup-function-in-unix>

```
128 FNR==NR{
```

```
129     a[$1]=$2
```

```
130     next
```

```
131 }
```

```
132 { if ($1 in a) {print $1, a[$1]} else {print $1, "NA"} }
```
